# Supplementary material
Source: Springer Nature journal article supplement (https://www.springermedizin.de/resource/supplementary/12987_2014_111_MOESM1_ESM.pdf/9680362)

**A**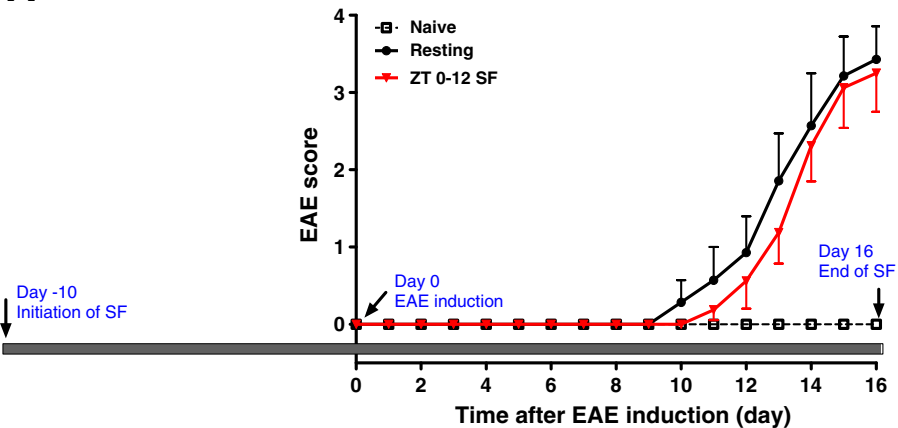**B**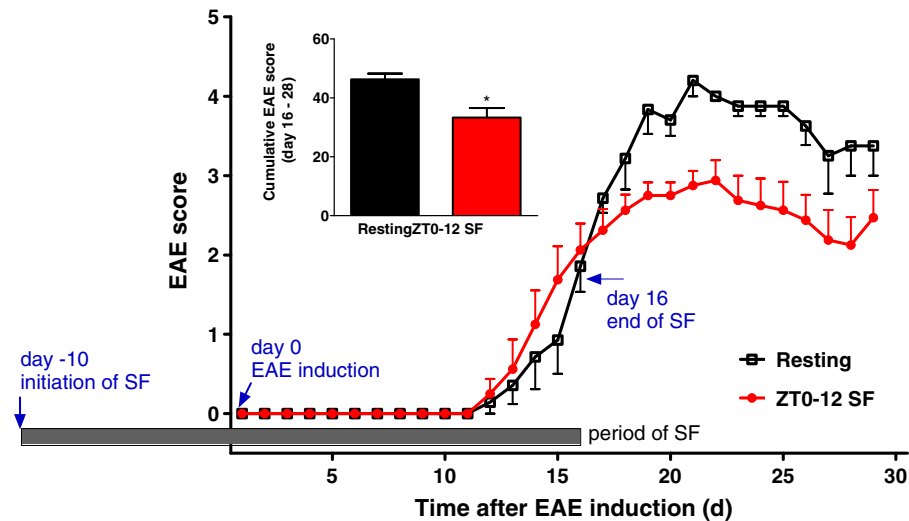

Supplement: MOESM1 [file 9680362]
